# Supplementary material for: Distribution of postpartum blood loss: modeling, estimation and application to clinical trials
Source: PubMed Central journal article supplement (PMC6280488; doi:10.1186/s12978-018-0641-1), 2018-12-04
Supplement: 12978_2018_641_MOESM2_ESM.pdf [file 12978_2018_641_MOESM2_ESM.pdf]

Table A2. Goodness of fit statistics for the three-parameter lognormal and other distributions, by treatment for the Misoprostol trial, the Active Management trial and the Althabe trial, and for aggregated treatments for the CHAMPION trial

| <b>Trial</b>      | <b>Treatment</b>   | <b>Distribution</b>       | <b>AIC*</b> | <b>-2Loglikelihood</b> | <b>BIC*</b> |
|-------------------|--------------------|---------------------------|-------------|------------------------|-------------|
| Misoprostol       | Misoprostol        | Three-parameter Lognormal | 122626.20   | 122620.19              | 122647.58   |
|                   |                    | Log Generalized Gamma     | 122639.50   | 122633.50              | 122660.88   |
|                   |                    | Lognormal                 | 122668.73   | 122664.73              | 122682.98   |
|                   |                    | Loglogistic               | 122747.84   | 122743.84              | 122762.10   |
|                   |                    | Weibull                   | 123996.77   | 123992.77              | 124011.03   |
|                   |                    | LEV                       | 124454.15   | 124450.15              | 124468.41   |
|                   | Oxytocin           | Three-parameter Lognormal | 120155.96   | 120149.96              | 120177.35   |
|                   |                    | Log Generalized Gamma     | 120361.89   | 120355.89              | 120383.28   |
|                   |                    | LEV                       | 122058.99   | 122054.99              | 122073.25   |
| Active Management | Simplified Package | Three-parameter Lognormal | 153067.61   | 153061.61              | 153089.69   |
|                   |                    | Log Generalized Gamma     | 153203.14   | 153197.14              | 153225.22   |
|                   |                    | LEV                       | 154419.72   | 154415.71              | 154434.44   |
|                   | Full Package       | Three-parameter Lognormal | 152454.39   | 152448.39              | 152476.47   |
|                   |                    | Log Generalized Gamma     | 152623.15   | 152617.15              | 152645.23   |
|                   |                    | LEV                       | 154008.31   | 154004.31              | 154023.03   |
| CHAMPION          | Aggregated         | Three-parameter Lognormal | 263897.57   | 263891.57              | 263921.36   |
|                   |                    | Log Generalized Gamma     | 264203.15   | 264197.15              | 264226.94   |
|                   |                    | LEV                       | 269155.78   | 269151.78              | 269171.64   |
| Althabe et al     | Hands Off          | Three-parameter Lognormal | 1312.4056   | 1306.1503              | 1319.9052   |
|                   |                    | Lognormal                 | 1312.7782   | 1308.6518              | 1317.8218   |
|                   |                    | Loglogistic               | 1314.8331   | 1310.7068              | 1319.8767   |
|                   |                    | LEV                       | 1326.3266   | 1322.2003              | 1331.3702   |
|                   | CCT                | Three-parameter Lognormal | 1332.0212   | 1325.7738              | 1339.6192   |
|                   |                    | Lognormal                 | 1335.2346   | 1331.1121              | 1340.3424   |
|                   |                    | Loglogistic               | 1336.5424   | 1332.4199              | 1341.6502   |
|                   |                    | LEV                       | 1354.9820   | 1350.8595              | 1360.0898   |

\* AIC: Akaike Information Criterion; BIC: Bayesian Information Criterion
