# Supplementary material for: Distribution of postpartum blood loss: modeling, estimation and application to clinical trials
Source: PubMed Central journal article supplement (PMC6280488; doi:10.1186/s12978-018-0641-1), 2018-12-04
Supplement: 12978_2018_641_MOESM3_ESM.pdf [file 12978_2018_641_MOESM3_ESM.pdf]

Table A6. Quantiles for the fitted three-parameter lognormal and empirical distributions with 95% CI, by treatment for the Misoprostol trial, the Active Management trial and the Althabe et al trial, and for aggregated treatments for the CHAMPION trial

| Trial                    | Treatment                 | %  | Three-parameter lognormal distribution |             |             | Empirical distribution |             |             |
|--------------------------|---------------------------|----|----------------------------------------|-------------|-------------|------------------------|-------------|-------------|
|                          |                           |    | Quantile                               | 95% CI      |             | Quantile               | 95% CI      |             |
|                          |                           |    |                                        | Lower limit | Upper limit |                        | Lower limit | Upper limit |
| <b>Misoprostol</b>       | <b>Misoprostol</b>        | 1  | 42.1                                   | 40.2        | 43.8        | 50                     | 44          | 50          |
|                          |                           | 5  | 73.6                                   | 71.7        | 75.5        | 99                     | 80          | 100         |
|                          |                           | 10 | 97.8                                   | 95.7        | 99.9        | 100                    | 100         | 100         |
|                          |                           | 25 | 155.2                                  | 152.5       | 157.9       | 150                    | 150         | 160         |
|                          |                           | 50 | 255.9                                  | 252.0       | 259.9       | 250                    | 244         | 250         |
|                          |                           | 75 | 418.5                                  | 411.7       | 425.4       | 400                    | 400         | 403         |
|                          |                           | 90 | 648.7                                  | 635.9       | 662.1       | 680.6                  | 650         | 700         |
|                          |                           | 95 | 842.2                                  | 822.9       | 862.5       | 900                    | 870         | 900         |
|                          |                           | 99 | 1372.1                                 | 1330.6      | 1415.8      | 1400                   | 1360        | 1500        |
|                          | <b>Oxytocin</b>           | 1  | 34.9                                   | 33.2        | 36.5        | 39                     | 33          | 41          |
|                          |                           | 5  | 63.2                                   | 61.5        | 64.9        | 55                     | 50          | 70          |
|                          |                           | 10 | 84.7                                   | 82.9        | 86.6        | 100                    | 100         | 100         |
|                          |                           | 25 | 135.3                                  | 132.9       | 137.6       | 140                    | 140         | 145         |
|                          |                           | 50 | 222.9                                  | 219.5       | 226.4       | 200                    | 200         | 200         |
|                          |                           | 75 | 362.8                                  | 357.0       | 368.7       | 350                    | 350         | 360         |
|                          |                           | 90 | 558.6                                  | 547.8       | 570.0       | 560                    | 539         | 600         |
|                          |                           | 95 | 721.9                                  | 705.6       | 739.0       | 800                    | 739         | 800         |
|                          |                           | 99 | 1164.5                                 | 1129.7      | 1201.2      | 1328.8                 | 1250        | 1400        |
| <b>Active Management</b> | <b>Simplified Package</b> | 1  | 17.6                                   | 15.5        | 19.6        | 9.4                    | 9.4         | 14.2        |
|                          |                           | 5  | 52.3                                   | 50.4        | 54.1        | 51.9                   | 47.2        | 53.8        |
|                          |                           | 10 | 77.8                                   | 75.8        | 79.7        | 81.1                   | 78.3        | 84.9        |
|                          |                           | 25 | 135.7                                  | 133.3       | 138.2       | 139.6                  | 135.8       | 141.5       |
|                          |                           | 50 | 232.2                                  | 228.8       | 235.5       | 234.0                  | 229.2       | 235.8       |
|                          |                           | 75 | 379.4                                  | 374.0       | 384.8       | 367.9                  | 361.3       | 375.5       |
|                          |                           | 90 | 577.1                                  | 567.4       | 587.2       | 576.4                  | 566.0       | 584.9       |
|                          |                           | 95 | 736.9                                  | 722.4       | 752.0       | 753.8                  | 729.2       | 768.9       |
|                          |                           | 99 | 1155.1                                 | 1124.6      | 1187.4      | 1244.5                 | 1185.8      | 1324.5      |
|                          | <b>Full Package</b>       | 1  | 14.8                                   | 12.8        | 16.7        | 9.4                    | 9.4         | 9.4         |
|                          |                           | 5  | 47.2                                   | 45.4        | 48.9        | 47.2                   | 47.2        | 47.2        |
|                          |                           | 10 | 71.3                                   | 69.5        | 73.1        | 75.5                   | 72.6        | 75.5        |
|                          |                           | 25 | 126.6                                  | 124.3       | 129.0       | 129.2                  | 125.5       | 132.1       |
|                          |                           | 50 | 219.9                                  | 216.7       | 223.2       | 217.9                  | 215.1       | 224.5       |
|                          |                           | 75 | 364.4                                  | 359.1       | 369.8       | 355.7                  | 349.1       | 361.3       |
|                          |                           | 90 | 561.0                                  | 551.3       | 571.1       | 566.0                  | 549.1       | 575.5       |
|                          |                           | 95 | 721.6                                  | 707.0       | 736.8       | 726.4                  | 709.4       | 749.1       |
|                          |                           | 99 | 1146.4                                 | 1115.3      | 1179.4      | 1244.5                 | 1198.1      | 1329.2      |

| Trial         | Treatment  | %      | Three-parameter lognormal distribution |             |             | Empirical distribution |             |             |
|---------------|------------|--------|----------------------------------------|-------------|-------------|------------------------|-------------|-------------|
|               |            |        | Quantile                               | 95% CI      |             | Quantile               | 95% CI      |             |
|               |            |        |                                        | Lower limit | Upper limit |                        | Lower limit | Upper limit |
| CHAMPION      | Aggregated | 1      | 9.6                                    | 8.8         | 10.5        | 1.9                    | 0.9         | 2.8         |
|               |            | 5      | 30.9                                   | 30.1        | 31.7        | 21.7                   | 19.8        | 22.6        |
|               |            | 10     | 47.9                                   | 47.0        | 48.7        | 36.8                   | 35.8        | 37.7        |
|               |            | 25     | 89.7                                   | 88.5        | 90.9        | 81.1                   | 79.2        | 83.0        |
|               |            | 50     | 166.7                                  | 164.9       | 168.6       | 161.3                  | 158.5       | 163.2       |
|               |            | 75     | 297.9                                  | 294.6       | 301.2       | 294.3                  | 289.6       | 299.1       |
|               |            | 90     | 492.9                                  | 486.3       | 499.7       | 479.2                  | 470.8       | 487.7       |
|               |            | 95     | 663.0                                  | 652.5       | 673.9       | 650.9                  | 637.7       | 670.8       |
|               |            | 99     | 1148.5                                 | 1123.7      | 1174.4      | 1168.7                 | 1132.1      | 1222.6      |
| Althabe et al | Hands Off  | 1      | 104.6                                  | 87.2        | 121.4       | 101.5                  | 101.5       | 1624.3      |
|               |            | 5      | 135.8                                  | 116.4       | 153.7       | 123.9                  | 101.5       | 159.8       |
|               |            | 10     | 160.0                                  | 139.2       | 180.5       | 159.2                  | 124.1       | 189.9       |
|               |            | 25     | 217.4                                  | 193.6       | 245.8       | 228.9                  | 186.1       | 253.8       |
|               |            | 50     | 318.7                                  | 286.6       | 361.7       | 310.2                  | 274.5       | 377.9       |
|               |            | 75     | 483.3                                  | 422.9       | 562.3       | 487.4                  | 423.0       | 564.0       |
|               |            | 90     | 717.9                                  | 609.2       | 888.9       | 756.1                  | 562.1       | 1026.5      |
|               |            | 95     | 915.9                                  | 753.3       | 1194.8      | 1027.0                 | 753.9       | 1624.3      |
|               |            | 99     | 1460.6                                 | 1109.6      | 2139.3      | 1624.3                 | 101.5       | 1624.3      |
|               | CCT        | 1      | 96.4                                   | 73.8        | 108.9       | 95.9                   | 95.9        | 1863.1      |
|               |            | 5      | 120.6                                  | 103.4       | 134.7       | 109.6                  | 95.9        | 139.1       |
|               |            | 10     | 140.0                                  | 124.6       | 156.8       | 139.9                  | 107.2       | 157.9       |
|               |            | 25     | 188.1                                  | 166.4       | 212.3       | 191.8                  | 150.4       | 218.1       |
|               |            | 50     | 277.5                                  | 244.1       | 315.9       | 282.0                  | 242.5       | 319.6       |
|               |            | 75     | 430.8                                  | 374.4       | 505.5       | 423.0                  | 372.2       | 515.1       |
|               |            | 90     | 660.3                                  | 553.8       | 829.6       | 720.8                  | 503.8       | 827.2       |
|               |            | 95     | 861.4                                  | 697.9       | 1144.0      | 824.4                  | 723.8       | 1863.1      |
| 99            | 1439.1     | 1070.5 | 2158.1                                 | 1853.7      | 95.9        | 1863.1                 |             |             |
