# Supplementary material for: Distribution of postpartum blood loss: modeling, estimation and application to clinical trials
Source: Springer Nature journal article supplement (doi:10.1186/s12978-018-0641-1), 2018-12-01
Supplement: MOESM1 [file 16314316]

Table A1. Characteristics of studies analysed for blood loss: four randomised clinical trials (RCTs), one observational study

|                                                          | RCT or observational | Multicenter                      | Blind or Open-label | Type of hypotheses to compare treatments | Treatments                          | Outcome                                           | Method to measure blood loss | Trial sample size* | Effective sample size* |
|----------------------------------------------------------|----------------------|----------------------------------|---------------------|------------------------------------------|-------------------------------------|---------------------------------------------------|------------------------------|--------------------|------------------------|
| Misoprostol trial (Gülmezoglu 2001 <sup>17</sup> )       | RCT                  | Yes (9 countries worldwide)      | Double-blind        | Equivalence                              | Misoprostol, Oxytocin               | sPPH primary, PPH secondary                       | Jar-Volume                   | 18530              | 18442                  |
| Althabe et al trial (Althabe 2009 <sup>20</sup> )        | RCT                  | Yes (2 hospitals in one country) | Open-label          | Superiority                              | Controlled Cord Traction, Hands-off | Median blood loss primary, sPPH and PPH secondary | Drape-weight                 | 204                | 199                    |
| Active Management trial (Gülmezoglu 2012 <sup>19</sup> ) | RCT                  | Yes (8 countries worldwide)      | Open-label          | Non-inferiority                          | Simplified Package, Full Package    | sPPH primary, PPH secondary                       | Drape-weight                 | 24390              | 23242                  |
| CHAMPION trial (Widmer 2018 <sup>18</sup> )              | RCT                  | Yes (10 countries worldwide)     | Double-blind        | Non-inferiority                          | Carbetocin, Oxytocin                | sPPH primary, PPH secondary                       | Drape-weight                 | 29645              | 29470                  |
| Bamberg et al study (Bamberg 2016 <sup>21</sup> )        | Observational        | No                               | -                   | -                                        | -                                   | sPPH, PPH                                         | Drape-Volume                 | 1019               | 809                    |

\* Trial sample size is the total number of women enrolled in the trial; Effective sample size is the number of women with blood loss measure available.
